# Supplementary material for: Practical Issues in Imputation-Based Association Mapping
Source: PLOS journal article supplement (doi:10.1371/journal.pgen.1000279), 2008-12-04
Supplement: S2 (10.1371/journal.pgen.1000279.s002) [file journal.pgen.1000279.s002]

**Text S2: Relationship between  $\text{BF}_{\text{mean}}$  and  $\Lambda_{\text{mean}}$**

Here we develop an expression for the relationship between the Bayes factor  $\text{BF}_{\text{mean}}$  and the likelihood ratio statistic  $\Lambda_{\text{mean}}$ , under an additive model with  $d = 0$  and a fixed value of the prior variance of  $a$ ,  $\sigma_a$ . (In the main paper we use a Bayes factor that averages over several values of  $\sigma_a$ , and allows for some dominance, as in [1]. This is different from, though highly correlated with, the Bayes factor considered here.)

Under an additive model ( $d = 0$ ) the model (12) in the main text can be written as  $Y \sim N(\bar{X}\beta, 1/\tau)$ , where  $\bar{X}$  is the  $n \times 2$  design matrix  $(\mathbf{1}, \bar{g})$  whose first column is all 1s, and second column contains the expected genotype values for each individual. Using the prior D2 from [1] the Bayes factor for the alternative ( $a \neq 0$ ) vs the null ( $a = 0$ ) is:

$$\text{BF}_{\text{mean}} = \frac{(\alpha n)^{1/2}}{\det(\Omega)^{1/2}} \left( \frac{Y^t Y - Y^t \bar{X} \Omega^{-1} \bar{X}^t Y}{Y^t Y - n \bar{Y}^2} \right)^{-n/2} \quad (1)$$

where for notational convenience we have written  $\alpha$  for  $\sigma_a^{-2}$ , and  $\Omega = \begin{pmatrix} 0 & 0 \\ 0 & \alpha \end{pmatrix} + \bar{X}^t \bar{X}$ . If we let  $V$  denote  $n$  times the sample variance of  $g$ ,  $V = (g^t g - n \bar{g}^2)$ , then  $\det(\Omega) = n(\alpha + V)$ ,  $\det(\bar{X}^t \bar{X}) = nV$ , and

$$\begin{aligned} \Omega^{-1} &= \frac{1}{\det(\Omega)} \left[ \det(\bar{X}^t \bar{X}) (\bar{X}^t \bar{X})^{-1} + \begin{pmatrix} \alpha & 0 \\ 0 & 0 \end{pmatrix} \right] \\ &= \frac{V}{\alpha + V} \left[ (\bar{X}^t \bar{X})^{-1} + \begin{pmatrix} \alpha/nV & 0 \\ 0 & 0 \end{pmatrix} \right]. \end{aligned} \quad (2)$$

Now let  $\text{RSS}_0$  and  $\text{RSS}_1$  denote the residual sum of squares for the maximum likelihood estimates under the null and alternative hypotheses:

$$\begin{aligned} \text{RSS}_0 &= Y^t Y - n \bar{Y}^2 \\ \text{RSS}_1 &= Y^t Y - Y^t \bar{X} (\bar{X}^t \bar{X})^{-1} \bar{X}^t Y. \end{aligned} \quad (3)$$

Taking the log of (1), and substituting, we obtain

$$\begin{aligned} \log(\text{BF}_{\text{mean}}) &= 0.5 \log[\alpha/(\alpha + V)] - (n/2) \log \frac{\alpha/(\alpha + V) \text{RSS}_0 + V/(\alpha + V) \text{RSS}_1}{\text{RSS}_0} \\ &= 0.5 \log[\alpha/(\alpha + V)] - (n/2) \log \left[ 1 - \frac{V}{\alpha + V} \frac{\text{RSS}_0 - \text{RSS}_1}{\text{RSS}_0} \right]. \end{aligned} \quad (4)$$

Note also that the log-likelihood ratio statistic is given by

$$2 \log \Lambda_{\text{mean}} = n \log[\text{RSS}_0/\text{RSS}_1] = n \log[1 - (\text{RSS}_0 - \text{RSS}_1)/\text{RSS}_1]. \quad (5)$$

Four observations come directly from these expressions for  $\text{BF}_{\text{mean}}$  and  $\Lambda_{\text{mean}}$ :

- For fixed  $V$ , both  $\text{BF}_{\text{mean}}$  and  $\Lambda_{\text{mean}}$  are monotone decreasing in  $(\text{RSS}_0 - \text{RSS}_1)/\text{RSS}_1$ . Hence, among SNPs with the same value of  $V$ ,  $\text{BF}_{\text{mean}}$  and  $\Lambda_{\text{mean}}$  will produce the same ranking of SNPs.
- If  $\alpha = kV$  (so that for each SNP the prior variance on  $a$  is chosen to be inversely proportional to the  $V$  for that SNP) then  $\log(\text{BF}_{\text{mean}})$  and  $\Lambda_{\text{mean}}$  produce the same ranking of SNPs.
- For fixed  $V$ , if  $(\text{RSS}_0 - \text{RSS}_1)/\text{RSS}_1$  is small (which it will be in our applications, where effect sizes are small), then both  $\log(\text{BF}_{\text{mean}})$  and  $\Lambda_{\text{mean}}$  are approximately linear in  $(\text{RSS}_0 - \text{RSS}_1)/\text{RSS}_1$ , because  $\log(1 - x) \approx -x$  when  $x$  small. This explains the approximately linear relationships evident in Figure 3 in the main text.
- For fixed  $(\text{RSS}_0 - \text{RSS}_1)/\text{RSS}_0$ , and fixed  $\alpha$ ,  $\text{BF}_{\text{mean}} \rightarrow 1$  as  $V \rightarrow 0$ . Thus, compared with  $\Lambda_{\text{mean}}$ ,  $\text{BF}_{\text{mean}}$  down-weights SNPs with small  $V$ .

## References

- [1] Servin, B. and Stephens, M. (2007). Efficient multipoint analysis of association studies: candidate regions and quantitative traits. *PLoS Genetics*, **3**.
