# Supplementary material for: Practical Issues in Imputation-Based Association Mapping
Source: PLoS Genet. 2008 Dec 5;4(12):e1000279. doi: 10.1371/journal.pgen.1000279 (PMC2585794; doi:10.1371/journal.pgen.1000279)
Supplement: Text S3 — Laplace method to approximate Bayes factors for Logistic Regression. (0.06 MB PDF) [file pgen.1000279.s003.pdf]

### Text S3: Laplace method to approximate Bayes factors for Logistic Regression

We now detail the Laplace method that we use to approximate the Bayes factor for a binary phenotype  $Y = (y_1, \dots, y_n)$ , which we assume to be modeled by a logistic regression:

$$\log \frac{\Pr(y_i = 1)}{\Pr(y_i = 0)} = \langle x_i, \beta \rangle$$

where  $x_i = (1, g_i, 1(g_i = 1))$  is the  $i$ -th row of the design matrix  $X$ ;  $\beta = (\mu, a, d)$  is the vector of effect parameters; and  $\langle x_i, \beta \rangle$  denotes the inner product  $x_i^t \beta$ . Then

$$p_i := \Pr(y_i = 1) = \frac{e^{\langle x_i, \beta \rangle}}{1 + e^{\langle x_i, \beta \rangle}}, \quad (1)$$

and the log-likelihood is given by

$$\begin{aligned} l(\beta|X, Y) &= \sum_i (y_i \log p_i + (1 - y_i) \log (1 - p_i)) \\ &= \sum_{i=1}^n y_i \langle x_i, \beta \rangle - \sum_{i=1}^n \log (1 + e^{\langle x_i, \beta \rangle}). \end{aligned} \quad (2)$$

Under the null hypothesis we assume that  $a = d = 0$ , and the prior on  $\mu$  is  $N(0, \sigma_\mu^2)$ . That is,

$$p_0(\mu) = \frac{1}{2\pi\sigma_\mu} \exp\left(-\frac{\mu^2}{2\sigma_\mu^2}\right). \quad (3)$$

Under the alternative hypothesis, we assume the prior on  $\beta$  is  $N(0, \nu)$ , where  $\nu$  is a diagonal matrix with diagonal elements  $(\sigma_\mu^2, \sigma_a^2, \sigma_d^2)$ . That is,

$$p_1(\beta) = (2\pi)^{-\frac{3}{2}} \frac{1}{\sigma_\mu \sigma_a \sigma_d} \exp\left(-\frac{\mu^2}{2\sigma_\mu^2} - \frac{a^2}{2\sigma_a^2} - \frac{d^2}{2\sigma_d^2}\right). \quad (4)$$

The Bayes factor is given by

$$\text{BF} = \frac{\int l(\beta|X, Y) p_1(\beta) d\beta}{\int l(\mu|X, Y) p_0(\mu) d\mu}. \quad (5)$$

We approximate each of the integrals by the Laplace method,

$$\int e^{f(\beta)} d\beta \approx (2\pi)^{\frac{k}{2}} |H_{\beta^*}|^{-\frac{1}{2}} e^{f(\beta^*)} \quad (6)$$

where  $k$  is the dimension of the integral being approximated,  $\beta^*$  is the value at which  $f$  attains its maximum, and  $|H_{\beta^*}|$  is the absolute value of the determinant of the Hessian matrix of  $f$  evaluated at  $\beta^*$ .

Under the alternative,  $k = 3$ ,  $f(\beta) = l(\beta|X, Y) + \log p_1(\beta)$ . The Hessian  $H$  is given by

$$H = -(X^t W X + \nu) \quad (7)$$

where  $W$  is the diagonal matrix with  $W_{ii} = p_i(1 - p_i)$ . We obtained  $\beta^*$  by numerical optimization, using the Fletcher-Reeves conjugate gradient algorithm implemented in the GNU Scientific Library.

Under the null,  $k = 1$ ,  $f(\mu) = l(\mu|X, Y) + \log p_0(\mu)$ , and the Hessian is trivially obtained.
